# Supplementary material for: Expression and regulation of long noncoding RNAs during the osteogenic differentiation of periodontal ligament stem cells in the inflammatory microenvironment
Source: PubMed Central journal article supplement (PMC5656573; doi:10.1038/s41598-017-14451-4), 2017-10-25
Supplement: 41598_2017_14451_MOESM1_ESM.pdf [file 41598_2017_14451_MOESM1_ESM.pdf]

# **Expression and regulation of long noncoding RNAs during the osteogenic differentiation of periodontal ligament stem cells in the inflammatory microenvironment**

Qingbin Zhang<sup>1#</sup>, Li Chen<sup>2,3#</sup>, Shiman Cui<sup>1#</sup>, Yan Li<sup>2,3#</sup>, Qi Zhao<sup>2</sup>, Wei Cao<sup>1</sup>, Shixiang Lai<sup>1</sup>,  
Sanjun Yin<sup>4</sup>, Zhixiang Zuo<sup>2\*</sup>, Jian Ren<sup>2,3\*</sup>

<sup>1</sup>Key Laboratory of Oral Medicine, Guangzhou Institute of Oral Disease, Stomatology Hospital of Guangzhou Medical University, Guangzhou 510140, China

<sup>2</sup>Sun Yat-sen University Cancer Center, State Key Laboratory of Oncology in South China, Collaborative Innovation Center for Cancer Medicine, Sun Yat-sen University, Guangzhou 510060, China

<sup>3</sup>State Key Laboratory of Biocontrol, School of Life Sciences, Sun Yat-sen University, Guangzhou 510275, China

<sup>4</sup>Total Genomics Solution (TGS) Institute, Shenzhen 518000, China

# Contributed equally

\*Correspondence to: Tel/Fax: +86 20 39943788; Email: [renjian.sysu@gmail.com](mailto:renjian.sysu@gmail.com) (Jian Ren), [zuozhx@sysucc.org.cn](mailto:zuozhx@sysucc.org.cn) (Zhixiang Zuo)

**A**

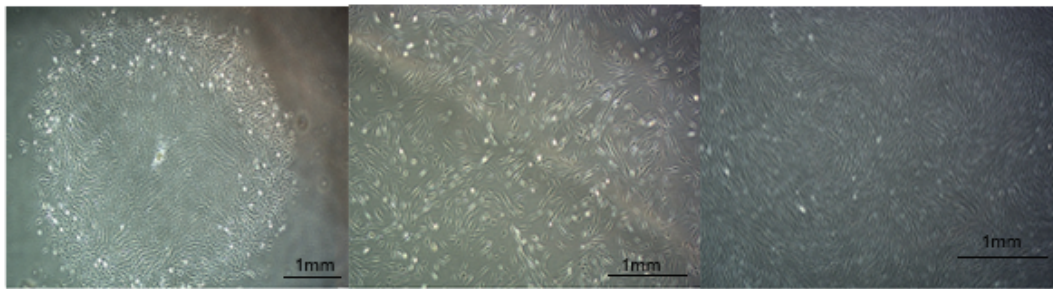

cells primarily culture in 7 days

cells subculture in 1 day

cells subculture in 3 days

**B**

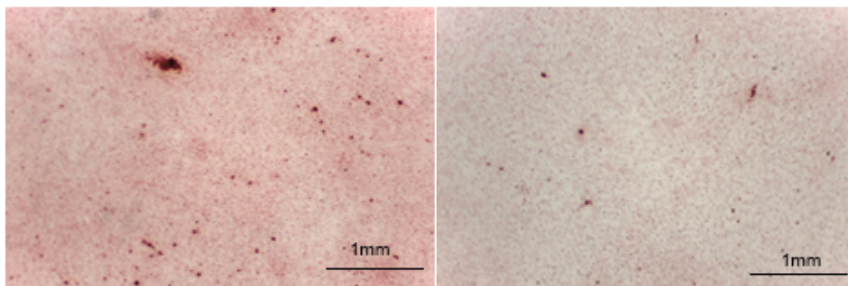

TNF- $\alpha$ (-)

TNF- $\alpha$ (+)

**C**

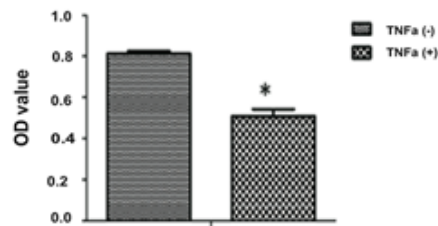

**Supplementary Fig. 1:** Clone-like appearance of PDLSCs. (A) From left to right: cells primarily cultured for 7 days, cells subcultured for 1 day and cells subcultured for 3 days. (B) Alizarin red staining of dPDLSCs (left) and TNF- $\alpha$ -PDLSCs (right). (C) Quantitative analysis of Alizarin red staining.

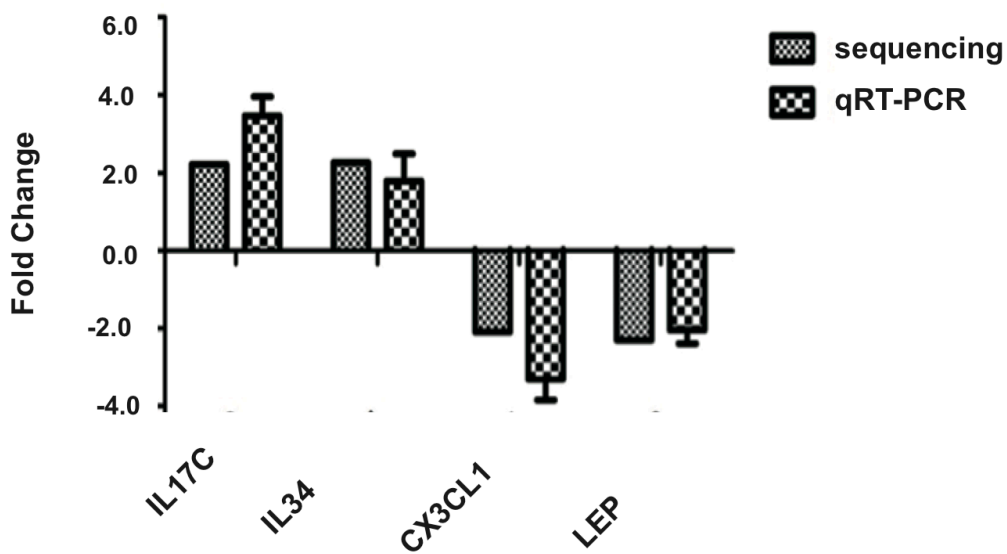

Supplementary Fig. 2: The expression change of four protein-coding genes validated by RT-PCR.

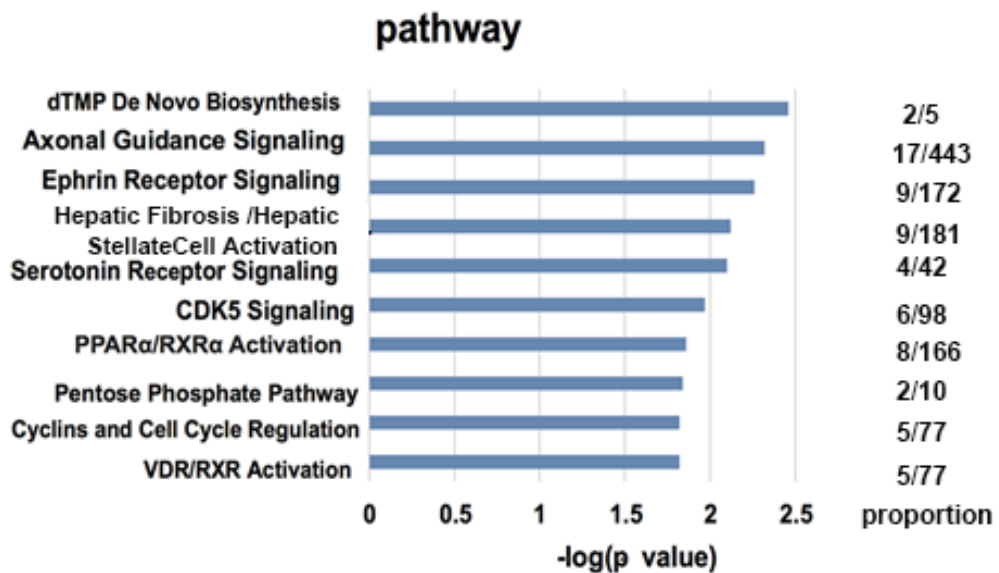

Supplementary Fig. 3: Significantly enriched pathways for neighboring protein-coding genes for DE lncRNAs between uPDLSCs and dPDLSCs.

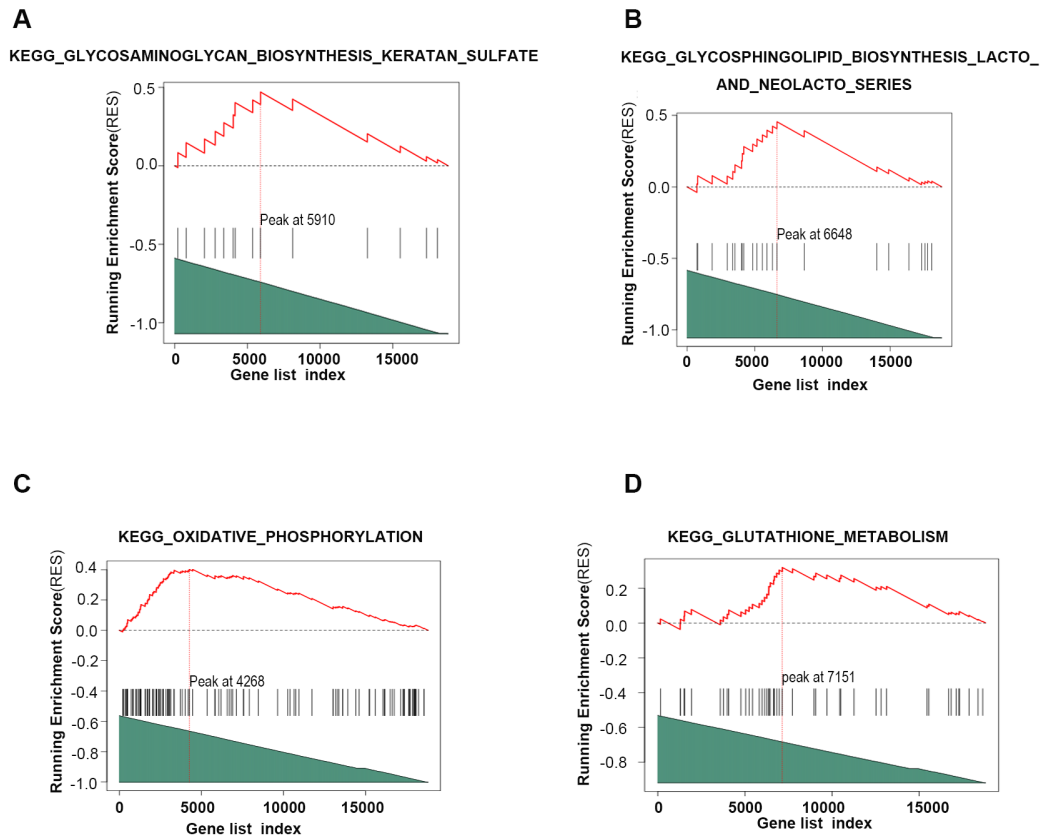

**Supplementary Fig. 4:** (A) (B) The top two significantly enriched pathways for DE lncRNAs between uPDLSCs and dPDLSCs via LncRNAs2Pathways. (C) (D) The top two significantly enriched pathways for DE lncRNAs between dPDLSCs and TNF- $\alpha$ -dPDLSCs via LncRNAs2Pathways.

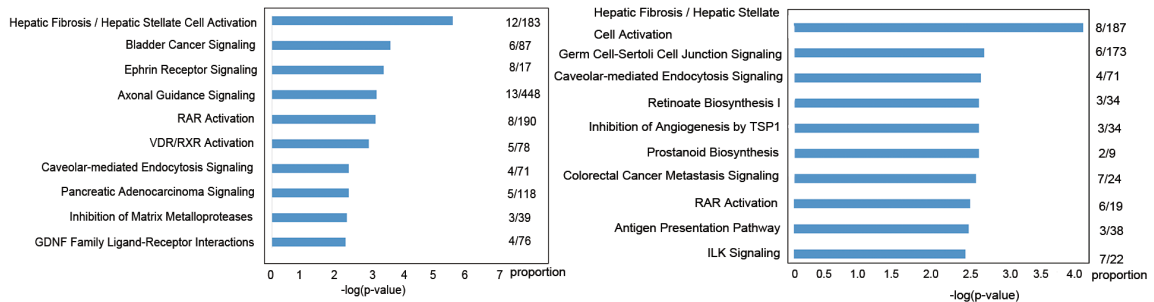

**Supplementary Fig. 5:** The significantly enriched pathways for mRNAs involved in ceRNA networks via IPA.

**Supplementary Table 1:** The final lncRNA reference consisted of 31,822 previously identified lncRNAs and 63 novel lncRNAs not annotated in lncRNA databases.

**Supplementary Table 2:** Differentially expressed lncRNAs identified by DESeq2 and EdgeR in dPDLSCs compared to uPDLSCs.

**Supplementary Table 3:** Differentially expressed lncRNAs identified by DESeq2 and EdgeR in TNF- $\alpha$ -dPDLSCs compared to dPDLSCs.

**Supplementary Table 4:** Differentially expressed protein-coding genes identified by DESeq2 and EdgeR in dPDLSCs compared to uPDLSCs.

**Supplementary Table 5:** Differentially expressed protein-coding genes identified by DESeq2 and EdgeR in TNF- $\alpha$ -dPDLSCs compared to dPDLSCs.

**Supplementary Table 6:** A. Significantly enriched pathways for DE lncRNAs between uPDLSCs and dPDLSCs via LncRNAs2Pathways analysis. B. Significantly enriched pathways for DE lncRNAs between dPDLSCs and TNF- $\alpha$ -dPDLSCs via LncRNAs2Pathways analysis.

**Supplementary Table 7:** A. the lncRNAs, mRNAs and shared miRNAs of lncRNA-mRNA ceRNA interactions in the DE lncRNAs between dPDLSCs and uPDLSCs. B. the lncRNAs, mRNAs and shared miRNAs of lncRNA-mRNA ceRNA interactions in the DE lncRNAs between TNF- $\alpha$ -dPDLSCs and dPDLSCs.
